# Supplementary material for: Profiling Basal Forebrain Cholinergic Neurons Reveals a Molecular Basis for Vulnerability Within the Ts65Dn&nbsp;Model of Down Syndrome and Alzheimer’s Disease
Source: Research Square preprint supplement (doi:10.21203/rs.3.rs-88218/v1), 2020-10-09
Supplement: Supplementary file 1 [file 2958256e83179e84184c5d53.xlsx]

## Sheet: Sheet1
	Sample	Description	LCM			RNA	RNA seq Library prep					Hi-Seq 4000 sequencing
			estimated # cells	# sections needed	section depth mm	RNA quantity pg/ml	RNA ml per reaction	Library size	size distribution	concentration pg/ml	molarity (pM)	concentration of library pool nM	Reads (millions)
16-357	3	Ts65Dn	660	15	20	81	12	416	30.3	1080.75	4401.5	0.431	26.9
16-490	4	Ts65Dn	540	18	20	141	12	451	33.8	2912.96	11360.2	0.431	27.8
17-153	5	Ts65Dn	535	15	20	211	12	390	34.5	445.06	1976.9	0.431	21.5
17-157	7	Ts65Dn	525	12	20	138	12	376	37.1	4298.35	19988.9	0.431	25.4
17-173	9	Ts65Dn	545	18	20	96	12	419	31.7	2426.24	9839.7	0.431	34.9
17-192	10	Ts65Dn	560	15	20	87	12	396	35.7	2592.3	11460.5	0.431	29.9
15-145	1	2N	520	18	20	106	12	494	25.7	13654.3	45639.6	0.431	30.1
15-147	2	2N	555	15	20	24	12	490	26.8	5164.02	17472.2	0.431	26.4
17-21	11	2N	500	15	20	111	12	454	31.1	3692.09	13960.8	0.431	19.2
17-56	12	2N	590	15	20	119	12	442	32.6	2981.49	11694.6	0.431	23.9
17-154	6	2N	578	18	20	63	12	504	26.8	26045.4	85979.9	0.431	25
17-172	8	2N	530	18	20	45	12	509	32.5	2631.27	9256.6	0.431	24.3
