# Supplementary material for: Profiling Basal Forebrain Cholinergic Neurons Reveals a Molecular Basis for Vulnerability Within the Ts65Dn&nbsp;Model of Down Syndrome and Alzheimer’s Disease
Source: Research Square preprint supplement (doi:10.21203/rs.3.rs-88218/v1), 2020-10-09
Supplement: Supplementary file 2 [file 3d6b661267ea30e8d1716ee8.xlsx]

## Sheet: Sheet1
IPA canonical pathways for Blue module	-log(p-value)	Ratio	z-score
Endocannabinoid Neuronal Synapse Pathway	7.97	0.234	2.785
Opioid Signaling Pathway	7.85	0.182	3.479
Calcium Signaling	5.97	0.175	3.157
Epithelial Adherens Junction Signaling	5.71	0.191	#NUM!
Synaptogenesis Signaling Pathway	5.28	0.147	2.967
Dopamine-DARPP32 Feedback in cAMP Signaling	5.09	0.178	1.4
CREB Signaling in Neurons	5.06	0.164	1.147
Huntington's Disease Signaling	4.93	0.156	-0.426
PI3K/AKT Signaling	4.91	0.171	1.043
Netrin Signaling	4.84	0.246	2.5
G Beta Gamma Signaling	4.58	0.189	2.558
GNRH Signaling	4.58	0.168	1.414
cAMP-mediated signaling	4.54	0.154	1.095
PTEN Signaling	4.35	0.183	-1.091
G-Protein Coupled Receptor Signaling	4.3	0.143	#NUM!
GABA Receptor Signaling	4.25	0.2	#NUM!
Protein Kinase A Signaling	4.09	0.128	-0.632
nNOS Signaling in Neurons	3.94	0.255	1.414
Synaptic Long Term Depression	3.87	0.153	4.158
Androgen Signaling	3.82	0.169	3
mTOR Signaling	3.78	0.148	1.414
ERK/MAPK Signaling	3.71	0.15	2.117
Tight Junction Signaling	3.59	0.155	#NUM!
Neuroinflammation Signaling Pathway	3.4	0.13	3.087
Synaptic Long Term Potentiation	3.31	0.163	0.894
Wnt/Ca+ pathway	3.3	0.21	1.387
Regulation of eIF4 and p70S6K Signaling	3.28	0.153	1.265
FAK Signaling	3.27	0.179	#NUM!
Ceramide Signaling	3.19	0.182	-0.535
Estrogen Receptor Signaling	3.19	0.125	2.03
ERK5 Signaling	3.16	0.194	0.277
Type II Diabetes Mellitus Signaling	3.14	0.155	0.632
D-myo-inositol (1,4,5)-trisphosphate Degradation	3.01	0.353	-0.816
Senescence Pathway	2.95	0.127	1.029
Reelin Signaling in Neurons	2.91	0.155	0.471
HIPPO signaling	2.89	0.176	0.333
NGF Signaling	2.77	0.158	0.728
BEX2 Signaling Pathway	2.75	0.177	1.069
Gustation Pathway	2.67	0.143	#NUM!
EIF2 Signaling	2.66	0.129	-0.258
Glycolysis I	2.66	0.269	-2.646
AMPK Signaling	2.65	0.131	1.213
Corticotropin Releasing Hormone Signaling	2.65	0.145	-1.091
Neuropathic Pain Signaling In Dorsal Horn Neurons	2.54	0.158	2
Glucocorticoid Receptor Signaling	2.48	0.116	#NUM!
Ephrin Receptor Signaling	2.46	0.133	1.414
ILK Signaling	2.46	0.132	1.8
IL-4 Signaling	2.45	0.165	#NUM!
PDGF Signaling	2.4	0.163	0.277
Calcium Transport I	2.36	0.4	1
Adipogenesis pathway	2.35	0.142	#NUM!
Amyotrophic Lateral Sclerosis Signaling	2.31	0.155	0.577
Superpathway of D-myo-inositol (1,4,5)-trisphosphate Metabolism	2.27	0.261	-0.816
CDK5 Signaling	2.25	0.148	0.258
Apoptosis Signaling	2.23	0.152	-0.577
Axonal Guidance Signaling	2.19	0.105	#NUM!
tRNA Charging	2.17	0.205	0
Rac Signaling	2.09	0.143	1.291
Inhibition of ARE-Mediated mRNA Degradation Pathway	2.09	0.139	0.243
NER Pathway	2.07	0.146	0.258
Wnt/β-catenin Signaling	2.06	0.127	0.894
Circadian Rhythm Signaling	2.04	0.212	#NUM!
Neurotrophin/TRK Signaling	2.03	0.158	0
Myc Mediated Apoptosis Signaling	2	0.18	0.333
Assembly of RNA Polymerase II Complex	2	0.18	#NUM!
Role of IL-17F in Allergic Inflammatory Airway Diseases	1.97	0.19	0.378
P2Y Purigenic Receptor Signaling Pathway	1.92	0.134	1
14-3-3-mediated Signaling	1.92	0.134	0.258
Telomerase Signaling	1.92	0.14	1.732
tRNA Splicing	1.91	0.186	1.89
BAG2 Signaling Pathway	1.91	0.186	-0.707
NF-κB Signaling	1.9	0.123	1.789
PPARα/RXRα Activation	1.89	0.121	-1.5
p70S6K Signaling	1.85	0.132	1.604
Lymphotoxin β Receptor Signaling	1.84	0.17	0.707
Sirtuin Signaling Pathway	1.81	0.11	1.633
HGF Signaling	1.79	0.135	1.155
PEDF Signaling	1.77	0.146	0.302
PFKFB4 Signaling Pathway	1.74	0.174	0.707
Actin Cytoskeleton Signaling	1.73	0.115	0.626
Superpathway of Inositol Phosphate Compounds	1.69	0.116	0.426
Gap Junction Signaling	1.69	0.116	#NUM!
D-myo-inositol-5-phosphate Metabolism	1.67	0.122	0.471
Endocannabinoid Developing Neuron Pathway	1.66	0.13	0
Apelin Endothelial Signaling Pathway	1.66	0.13	1.387
NRF2-mediated Oxidative Stress Response	1.65	0.116	0.632
CNTF Signaling	1.64	0.158	0
Glutamate Receptor Signaling	1.64	0.158	2.236
Neuregulin Signaling	1.62	0.135	0.905
ErbB4 Signaling	1.61	0.149	0.378
ATM Signaling	1.59	0.134	0.632
UVA-Induced MAPK Signaling	1.56	0.133	0.333
Amyloid Processing	1.54	0.16	-0.447
TNFR1 Signaling	1.54	0.16	1.414
B Cell Activating Factor Signaling	1.54	0.171	1.134
Heme Biosynthesis from Uroporphyrinogen-III I	1.53	0.5	#NUM!
RAR Activation	1.53	0.113	#NUM!
Death Receptor Signaling	1.46	0.132	2.111
3-phosphoinositide Biosynthesis	1.45	0.115	0
Oncostatin M Signaling	1.44	0.163	1.342
3-phosphoinositide Degradation	1.43	0.116	0.243
Endothelin-1 Signaling	1.43	0.112	1.886
LPS-stimulated MAPK Signaling	1.42	0.134	1.265
Phospholipase C Signaling	1.4	0.105	0.853
STAT3 Pathway	1.39	0.119	1.155
Gαq Signaling	1.36	0.114	1.213
BMP signaling pathway	1.32	0.129	1.414
EGF Signaling	1.32	0.145	0
Fc Epsilon RI Signaling	1.31	0.12	0.832
